# Supplementary material
Source: PubMed Central journal article supplement (PMC8923205)
Supplement: aac.02183-21-s0001.pdf [file aac.02183-21-s0001.pdf]

## Supplementary

Dataset S1. Genomes labelled *Klebsiella* in GenBank (accessed by 2021-01-01) and precise species identification.

Dataset S2. Genomes of the *K. oxytoca* complex in GenBank and genes encoding antimicrobial resistance and virulence.

Dataset S3. The 19 of genes unique to *K. oxytoca* complex could be assigned with an existing KEGG orthology (KO) number.

Dataset S4. SNP numbers between genomes belonging to STs seen in at least three countries.

Table S1. Type strains of *Klebsiella* and *Raoultella* species

Table S2. Precise species assignments of the 13,401 genomes labelled *Klebsiella* in NCBI (accessed by 2021-01-01).

Table S3. Genome characteristics of species of *Klebsiella oxytoca* complex, other *Klebsiella* species and *Raoultella* spp.

Table S4. Numbers of *K. oxytoca* complex genomes belonging to each ST.

References

**Fig S1. The genetic context of *bla*<sub>OXY</sub> in the *K. oxytoca* complex species, the corresponding region in *K. pneumoniae* and *K. indica*, and the region of the *K. oxytoca* species corresponding to that containing *bla*<sub>SHV</sub> in *K. pneumoniae*.** A, *bla*<sub>OXY</sub> and surrounding genes in species of the *K. oxytoca* complex and the corresponding region in *K. pneumoniae* and *K. indica*. In the corresponding chromosomal location of *bla*<sub>OXY</sub> in *K. oxytoca*, there is a gene encoding a myoinosose 2 dehydratase in *K. pneumoniae* and a gene encoding a transporter of the major facilitator superfamily (MFS). B, the region of the *K. oxytoca* species corresponding to that containing *bla*<sub>SHV</sub> in *K. pneumoniae*. In *K. pneumoniae*, a 16.1-kb region containing *bla*<sub>SHV</sub> is located between a gene encoding an AAA family ATPase and a gene encoding the peptidyl-dipeptidase Dcp and is absent from species of the *K. oxytoca* complex and *K. indica*. The corresponding regions species of the *K. oxytoca* complex and *K. indica* vary in genetic components and sizes and have no significant similarity with that of *K. pneumoniae*.

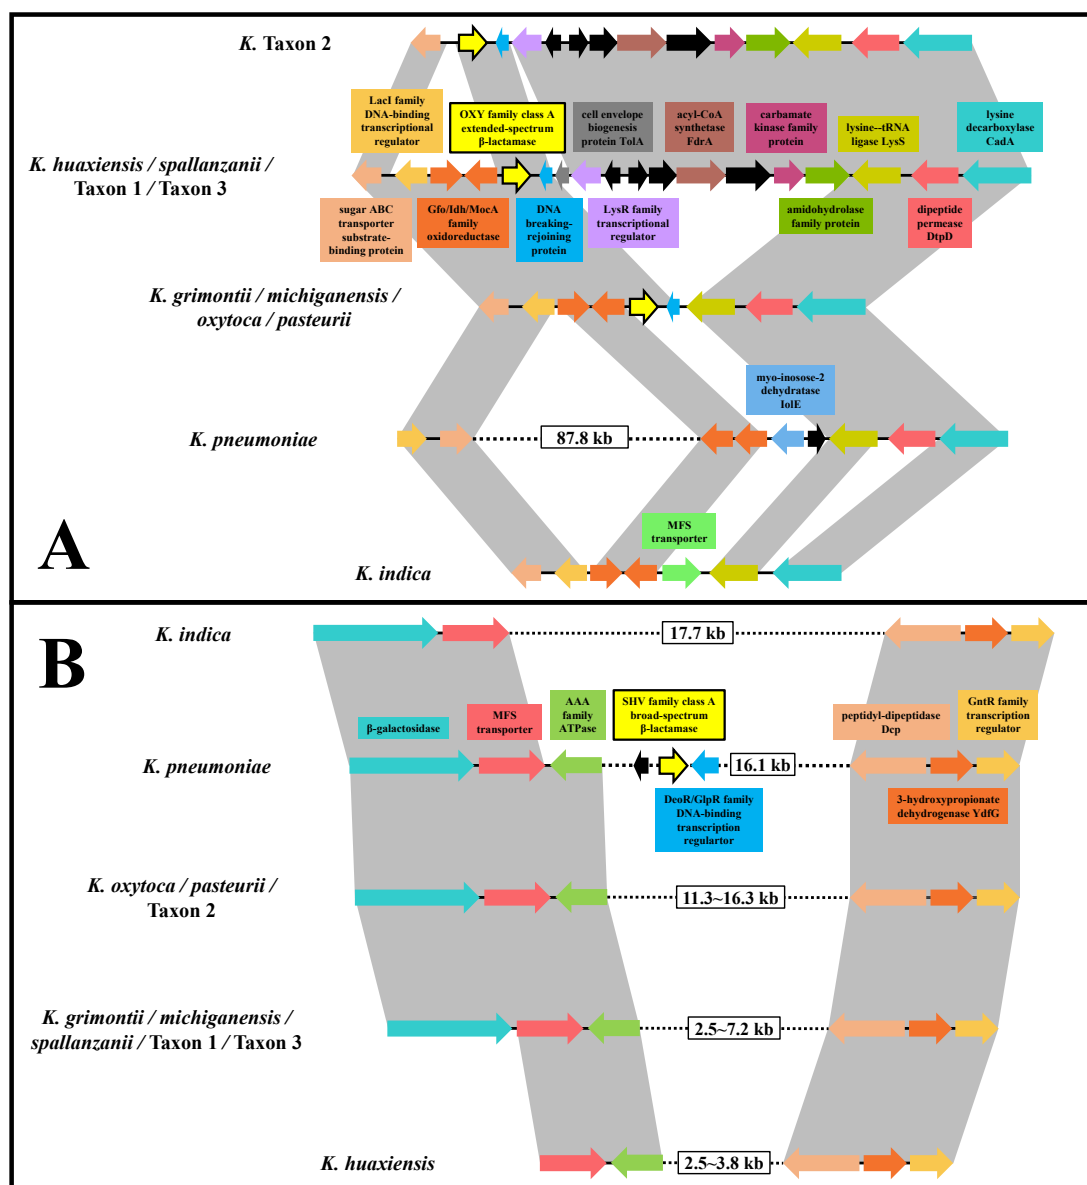

Table S1. Type strains of *Klebsiella* and *Raoultella* species

| Species / Taxon           | Type or reference strain  | Assembly accession no. | Reference |
|---------------------------|---------------------------|------------------------|-----------|
| <i>K. aerogenes</i>       | KCTC 2190 <sup>T</sup>    | GCA_000215745.1        | (1)       |
| <i>K. africana</i>        | SB5857 <sup>T</sup>       | GCA_900978845.1        | (2)       |
| <i>K. grimontii</i>       | 06D021 <sup>T</sup>       | GCA_900200035.1        | (3)       |
| <i>K. huaxiensis</i>      | WCHKI090001 <sup>T</sup>  | GCA_003261575.2        | (4)       |
| <i>K. indica</i>          | TOUT106 <sup>T</sup>      | GCA_005860775.1        | (5)       |
| <i>K. michiganensis</i>   | CCUG 66515 <sup>T</sup>   | GCA_009173485.1        | (6)       |
| <i>K. oxytoca</i>         | NCTC13727 <sup>T</sup>    | GCA_900636985.1        | (7)       |
| <i>K. pasteurii</i>       | SB6412 <sup>T</sup>       | GCA_902158725.1        | (8)       |
| <i>K. pneumoniae</i>      | FDAARGOS_775 <sup>T</sup> | GCA_006364295.1        | (9)       |
| <i>K. quasipneumoniae</i> | 01A030 <sup>T</sup>       | GCA_000751755.1        | (10)      |
| <i>K. quasivariicola</i>  | KPN1705 <sup>T</sup>      | GCA_002269255.1        | (11)      |
| <i>K. spallanzanii</i>    | SB6411 <sup>T</sup>       | GCA_902158555.1        | (8)       |
| <i>K. variicola</i>       | DSM 15968 <sup>T</sup>    | GCA_000828055.2        | (12)      |
| Taxon 1                   | 67                        | GCA_003201885.1        | (13)      |
| Taxon 2                   | P620                      | GCA_009707385.1        | (13)      |
| Taxon 3                   | RHBSTW-00484              | GCA_013705725.1        | (13)      |
| <i>R. electrica</i>       | DSM 102253 <sup>T</sup>   | GCA_006711645.1        | (14)      |
| <i>R. ornithinolytica</i> | NBRC 105727 <sup>T</sup>  | GCA_001598295.1        | (15)      |
| <i>R. planticola</i>      | ATCC 33531 <sup>T</sup>   | GCA_000735435.1        | (15)      |
| <i>R. terrigena</i>       | NBRC 14941 <sup>T</sup>   | GCA_006539725.1        | (15)      |

Table S2. Precise species assignments of the 13,401 genomes labelled *Klebsiella* in NCBI (accessed by 2021-01-01)

| Species <sup>a</sup>                   | no. of strains |
|----------------------------------------|----------------|
| <i>Cedecea genomosp. B</i>             | 1              |
| <i>Enterobacter cloacae</i>            | 1              |
| <i>Escherichia coli</i>                | 1              |
| <i>Klebsiella aerogenes</i>            | 268            |
| <i>Klebsiella africana</i>             | 1              |
| <b><i>Klebsiella grimontii</i></b>     | <b>128</b>     |
| <b><i>Klebsiella huaxiensis</i></b>    | <b>3</b>       |
| <i>Klebsiella indica</i>               | 2              |
| <b><i>Klebsiella michiganensis</i></b> | <b>233</b>     |
| <b><i>Klebsiella oxytoca</i></b>       | <b>183</b>     |
| <b><i>Klebsiella pasteurii</i></b>     | <b>31</b>      |
| <i>Klebsiella pneumoniae</i>           | 11,451         |
| <i>Klebsiella quasipneumoniae</i>      | 535            |
| <i>Klebsiella quasivariicola</i>       | 23             |
| <b><i>Klebsiella spallanzanii</i></b>  | <b>4</b>       |
| <b><i>Klebsiella</i> Taxon 1</b>       | <b>1</b>       |
| <b><i>Klebsiella</i> Taxon 2</b>       | <b>1</b>       |
| <b><i>Klebsiella</i> Taxon 3</b>       | <b>4</b>       |
| <i>Klebsiella</i> Taxon 4              | 16             |
| <i>Klebsiella</i> Taxon 5              | 39             |
| <i>Klebsiella variicola</i>            | 460            |
| <i>Kluyvera ascorbata</i>              | 1              |
| <i>Kluyvera genomosp. 2</i>            | 7              |
| <i>Kosakonia cowanii</i>               | 1              |
| <i>Raoultella ornithinolytica</i>      | 3              |
| <i>Raoultella planticola</i>           | 1              |
| <i>Serratia nevei</i>                  | 1              |
| <i>Superficieibacter electus</i>       | 1              |
| Total                                  | 13,401         |

<sup>a</sup>Species of *K. oxytoca* complex are highlighted in bold.

Table S3. Genome characteristics of species of *Klebsiella oxytoca* complex, other *Klebsiella* species, and *Raoultella* spp.<sup>a</sup>

|                                      | No. of CDS <sup>a</sup> | No. of tRNA <sup>a</sup> | Genome size, bp <sup>a</sup>      | GC content, % <sup>a</sup> |
|--------------------------------------|-------------------------|--------------------------|-----------------------------------|----------------------------|
| <i>Klebsiella oxytoca</i> complex    | 5,757 [4,542 - 6,902]   | 75 [24 - 92]             | 6,190,463 [4,959,239 - 7,227,285] | 55 [52.90 - 56.65]         |
| <i>Klebsiella pneumoniae</i> complex | 5,242 [4,219 - 6,433]   | 77 [20 - 115]            | 5,601,000 [4,571,695 - 6,719,317] | 57 [54.73 - 58.63]         |
| <i>Klebsiella aerogenes</i> complex  | 4,889 [4,519 - 5,591]   | 72 [24 - 116]            | 5,281,915 [4,934,573 - 5,833,521] | 55 [54.22 - 55.43]         |
| <i>Klebsiella indica</i>             | 4,688 [4,677 - 4,698]   | 82 [77 - 86]             | 5,230,046 [5,215,453 - 5,244,638] | 54 [53.51 - 53.53]         |
| <i>Raoultella</i> spp.               | 5,380 [4,664 - 6,236]   | 78 [26 - 116]            | 5,800,232 [5,105,583 - 6,722,439] | 56 [54.13 - 58.04]         |

<sup>a</sup>Values are mean [range].

Table S4. Numbers of *K. oxytoca* complex genomes belonging to each ST<sup>a</sup>.

| ST  | No. | ST   | No. |
|-----|-----|-----|-----|-----|-----|-----|-----|-----|-----|------|-----|
| 1   | 1   | 108 | 5   | 236 | 1   | 375 | 4   | N40 | 1   | N80  | 6   |
| 2   | 25  | 109 | 2   | 237 | 2   | N1  | 3   | N41 | 3   | N81  | 1   |
| 11  | 6   | 127 | 2   | 239 | 2   | N2  | 1   | N42 | 1   | N82  | 1   |
| 13  | 1   | 135 | 2   | 240 | 1   | N3  | 1   | N43 | 1   | N83  | 2   |
| 18  | 1   | 138 | 3   | 246 | 3   | N4  | 1   | N44 | 2   | N84  | 1   |
| 19  | 4   | 141 | 1   | 253 | 1   | N5  | 1   | N45 | 1   | N85  | 1   |
| 20  | 1   | 143 | 4   | 257 | 1   | N6  | 1   | N46 | 1   | N86  | 2   |
| 27  | 8   | 144 | 1   | 258 | 4   | N7  | 1   | N47 | 1   | N87  | 1   |
| 28  | 1   | 145 | 7   | 262 | 1   | N8  | 3   | N48 | 1   | N88  | 1   |
| 29  | 11  | 146 | 1   | 263 | 8   | N9  | 1   | N49 | 1   | N89  | 1   |
| 30  | 2   | 151 | 3   | 266 | 1   | N10 | 1   | N50 | 1   | N90  | 1   |
| 31  | 1   | 153 | 1   | 278 | 4   | N11 | 2   | N51 | 1   | N91  | 1   |
| 32  | 4   | 157 | 4   | 279 | 1   | N12 | 1   | N52 | 1   | N92  | 2   |
| 34  | 1   | 168 | 4   | 282 | 1   | N13 | 1   | N53 | 1   | N93  | 1   |
| 36  | 8   | 170 | 1   | 285 | 1   | N14 | 1   | N54 | 2   | N94  | 2   |
| 37  | 5   | 172 | 2   | 287 | 1   | N15 | 1   | N55 | 1   | N95  | 1   |
| 40  | 6   | 176 | 12  | 291 | 1   | N16 | 1   | N56 | 1   | N96  | 1   |
| 41  | 2   | 177 | 2   | 294 | 1   | N17 | 2   | N57 | 1   | N97  | 1   |
| 43  | 7   | 179 | 1   | 300 | 1   | N18 | 1   | N58 | 2   | N98  | 1   |
| 44  | 2   | 180 | 2   | 302 | 1   | N19 | 1   | N59 | 1   | N99  | 1   |
| 47  | 2   | 181 | 1   | 303 | 1   | N20 | 2   | N60 | 2   | N100 | 1   |
| 48  | 2   | 182 | 1   | 311 | 3   | N21 | 1   | N61 | 1   | N101 | 1   |
| 50  | 10  | 183 | 2   | 315 | 1   | N22 | 1   | N62 | 1   | N102 | 1   |
| 52  | 4   | 184 | 3   | 316 | 1   | N23 | 1   | N63 | 1   | N103 | 3   |
| 53  | 3   | 185 | 1   | 317 | 2   | N24 | 1   | N64 | 1   | N104 | 1   |
| 58  | 9   | 186 | 8   | 319 | 1   | N25 | 1   | N65 | 1   | N105 | 1   |
| 59  | 1   | 193 | 1   | 320 | 1   | N26 | 7   | N66 | 1   | N106 | 1   |
| 82  | 1   | 199 | 36  | 321 | 1   | N27 | 1   | N67 | 1   | N107 | 1   |
| 83  | 1   | 200 | 1   | 322 | 1   | N28 | 1   | N68 | 1   | N108 | 1   |
| 84  | 7   | 202 | 7   | 323 | 1   | N29 | 1   | N69 | 1   | N109 | 4   |
| 85  | 16  | 205 | 1   | 324 | 4   | N30 | 1   | N70 | 4   | N110 | 1   |
| 86  | 1   | 213 | 2   | 327 | 1   | N31 | 1   | N71 | 1   | N111 | 1   |
| 88  | 10  | 215 | 10  | 330 | 1   | N32 | 1   | N72 | 1   | N112 | 1   |
| 92  | 3   | 216 | 8   | 341 | 1   | N33 | 1   | N73 | 1   | N113 | 1   |
| 93  | 1   | 221 | 1   | 350 | 2   | N34 | 14  | N74 | 4   | N114 | 1   |
| 95  | 4   | 222 | 2   | 351 | 5   | N35 | 1   | N75 | 1   | N115 | 1   |
| 98  | 2   | 223 | 3   | 360 | 1   | N36 | 4   | N76 | 1   | N116 | 1   |
| 101 | 1   | 225 | 2   | 361 | 5   | N37 | 2   | N77 | 1   |      |     |
| 103 | 1   | 226 | 1   | 364 | 2   | N38 | 6   | N78 | 2   |      |     |
| 104 | 4   | 227 | 1   | 366 | 1   | N39 | 1   | N79 | 2   |      |     |

<sup>a</sup>ST, the ST number; N1 to N116 are new STs whose numbers have been assigned in the multi-locus sequence typing database (<https://pubmlst.org/organisms/klebsiella-oxytoca>). No., the numbers of genomes for each ST.

## References

1. **Tindall BJ, Sutton G, Garrity GM.** 2017. *Enterobacter aerogenes* Hormaeche and Edwards 1960 (Approved Lists 1980) and *Klebsiella mobilis* Bascomb et al. 1971 (Approved Lists 1980) share the same nomenclatural type (ATCC 13048) on the Approved Lists and are homotypic synonyms, with consequences for the name *Klebsiella mobilis* Bascomb et al. 1971 (Approved Lists 1980). *Int J Syst Evol Microbiol* **67**:502-504.
2. **Rodrigues C, Passet V, Rakotondrasoa A, Diallo TA, Criscuolo A, Brisse S.** 2019. Description of *Klebsiella africanensis* sp. nov., *Klebsiella variicola* subsp. *tropicalensis* subsp. nov. and *Klebsiella variicola* subsp. *variicola* subsp. nov. *Res Microbiol* **170**:165-170.
3. **Passet V, Brisse S.** 2018. Description of *Klebsiella grimontii* sp. nov. *Int J Syst Evol Microbiol* **68**:377-381.
4. **Hu Y, Wei L, Feng Y, Xie Y, Zong Z.** 2019. *Klebsiella huaxiensis* sp. nov., recovered from human urine. *Int J Syst Evol Microbiol* **69**:333-336.
5. **Gujarati S, Chaudhari D, Hagir A, Khairnar M, Shouche Y, Rahi P.** 2020. *Klebsiella indica* sp. nov., isolated from the surface of a tomato. *Int J Syst Evol Microbiol* **70**:3278-3286.
6. **Saha R, Farrance CE, Verghese B, Hong S, Donofrio RS.** 2013. *Klebsiella michiganensis* sp. nov., a new bacterium isolated from a tooth brush holder. *Curr Microbiol* **66**:72-78.
7. **Lautrop H.** 1956. Gelatin-liquefying *Klebsiella* strains (*Bacterium oxytocolum* (Flugge) ). *Acta Pathol Microbiol Scand* **39**:375-384.
8. **Merla C, Rodrigues C, Passet V, Corbella M, Thorpe HA, Kallonen TVS, Zong Z, Marone P, Bandi C, Sasser D, Corander J, Feil EJ, Brisse S.** 2019. Description of *Klebsiella spallanzanii* sp. nov. and of *Klebsiella pasteurii* sp. nov. *Front Microbiol* **10**:2360.
9. **Trevisan V.** 1887. Sul Micrococco della rabbia e sulla possibilità di riconoscere durante il periodo d'incubazione, dall'esame del sangue della persona moricata, se ha contratta l'infezione rabbica. *Rendiconti dell'Istituto Lombardo di Scienze e Lettere (Ser 2)* **20**:88-105.
10. **Brisse S, Passet V, Grimont PAD.** 2014. Description of *Klebsiella quasipneumoniae* sp. nov., isolated from human infections, with two subspecies, *Klebsiella quasipneumoniae* subsp. *quasipneumoniae* subsp. nov. and *Klebsiella quasipneumoniae* subsp. *similipneumoniae* subsp. nov., and demonstration that *Klebsiella singaporensis* is a junior heterotypic synonym of *Klebsiella variicola*. *Int J Syst Evol Microbiol*

- 64:3146-3152.
11. **Long SW, Linson SE, Ojeda Saavedra M, Cantu C, Davis JJ, Brettin T, Olsen RJ.** 2017. Whole-Genome Sequencing of a Human Clinical Isolate of the Novel Species *Klebsiella quasivariicola* sp. nov. *Genome Announc* **5**.
  12. **Rosenblueth M, Martinez L, Silva J, Martinez-Romero E.** 2004. *Klebsiella variicola*, a novel species with clinical and plant-associated isolates. *Syst Appl Microbiol* **27**:27-35.
  13. **Yang J, Long H, Hu Y, Feng Y, McNally A, Zong Z.** 2021. *Klebsiella oxytoca* Complex: Update on Taxonomy, Antimicrobial Resistance, and Virulence. *Clin Microbiol Rev*:e0000621.
  14. **Kimura ZI, Chung KM, Itoh H, Hiraishi A, Okabe S.** 2014. *Raoultella electrica* sp. nov., isolated from anodic biofilms of a glucose-fed microbial fuel cell. *Int J Syst Evol Microbiol* **64**:1384-1388.
  15. **Drancourt M, Bollet C, Carta A, Rousselier P.** 2001. Phylogenetic analyses of *Klebsiella* species delineate *Klebsiella* and *Raoultella* gen. nov., with description of *Raoultella ornithinolytica* comb. nov., *Raoultella terrigena* comb. nov. and *Raoultella planticola* comb. nov. *Int J Syst Evol Microbiol* **51**:925-932.
